# Supplementary material
Source: PubMed Central journal article supplement (PMC8322455)
Supplement: mmc12.pdf [file mmc12.pdf]

## **Supplementary materials**

Fig. S1. Citrullinated histones and granule-proteins from neutrophils are present in COVID-19 sputum

Fig. S2. DNase 1 degrades NETs in COVID-19 sputum

Table S1. Patient characteristics treated with rhDNase

Fig. S3. Heat map of sputum proteome after treatment with rhDNase.

Fig.S4. Sputum proteins over time per patient

Fig. S5. Volcano plot depicting plasma proteins significantly regulated after rhDNase treatment.

Fig. S6. Plasma proteins intensity plots per patient over time.

Fig. S7. Comparison of blood plasma from untreated, rhDNase-treated, and healthy individuals.

Supplementary methods – Detailed methods section

### Tables Attached -

Supplementary table -1. List of proteins found in COVID-19 sputum

Supplementary table-2. Fold changes of proteins found in COVID-19 sputum before and after rhDNase treatment

Supplementary table-3. List of proteins found in blood plasma of COVID-19 patients

## Supplementary figures

Fig. S1. Citrullinated histones and granule-proteins from neutrophils are present in COVID-19 sputum

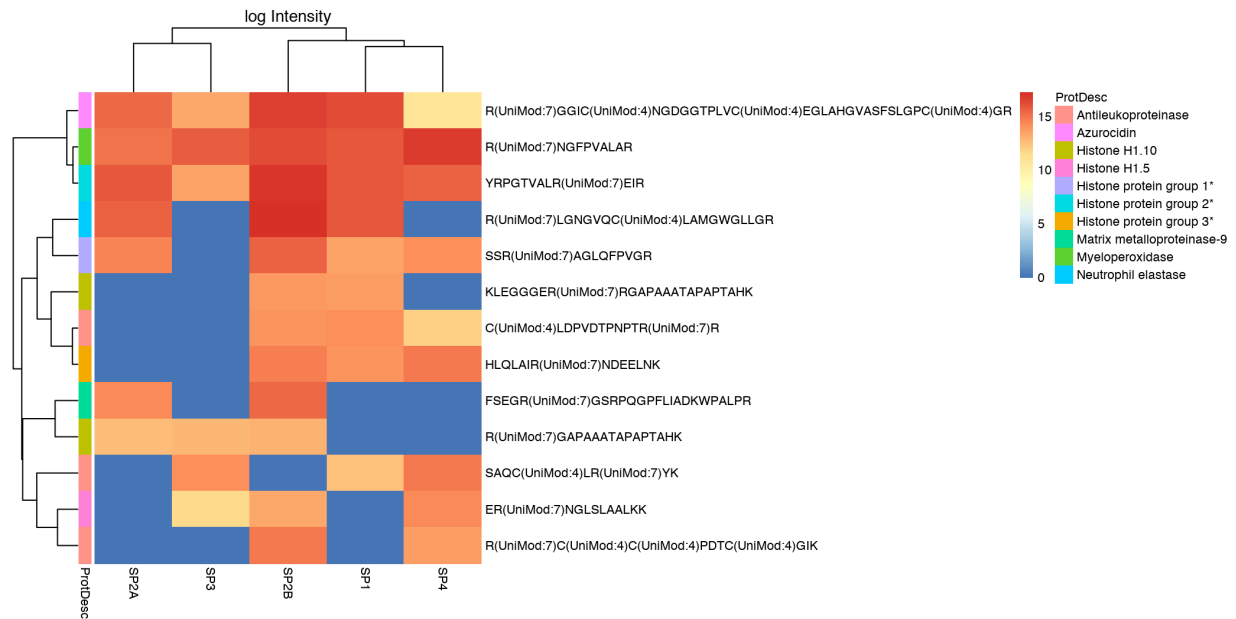

### Identification of citrullinated peptides derived from Neutrophil NET proteins in Covid-19 lung sputum using DIA-MS.

A spectral library which included citrullinated peptides was built by searching pooled and fractionated Covid-19 lung sputum DDA runs with the variable modification +0.98 Da on arginine residues (UniMod:7) and up to three missed trypsin cleavages. This library was used for searching individual DIA-MS runs of lung sputum (n=5) from 4 Covid-19 patients. The peptide level results were filtered as follows: including NET proteins and including peptides with citrullinated modifications and finally excluding peptides with the citrullinated modification located in the C-terminal position of a peptide. The intensities of the filtered citrullinated peptides are shown in the heatmap. Each row represent a citrullinated peptide with modifications shown on the right side. The mapped proteins and genes are indicated with colours on the left side.

Fig. S2. DNase 1 degrades NETs in COVID-19 sputum

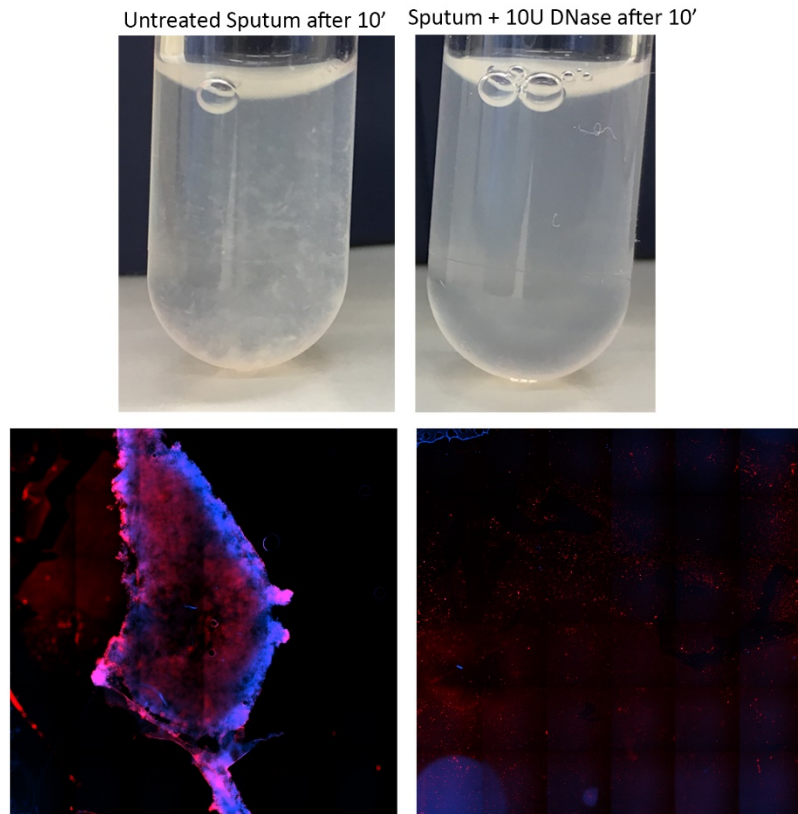

**DNase degrades NETs in COVID-19 sputum and reduces viscosity.** Sputum from a COVID-19 patient (n =1) was treated with +/- 10 units of DNase (Abcam) for 10 minutes at 37 degrees Celsius. This resulted in clarification of the sputum and reduced viscosity. Immunofluorescence against neutrophil elastase and DNA revealed that DNase treatment degraded NETs in COVID-19 sputum. Whereas large NETs persisted in untreated COVID-19 sputum.

**Table S1.** Baseline characteristics and clinical parameters of SARS-Cov2 positive patients prior to treatment with rhDNase

|                                                                               | TP1        | TP2            | TP3        | TP4       | TP5        |
|-------------------------------------------------------------------------------|------------|----------------|------------|-----------|------------|
| <b>Baseline characteristics</b>                                               |            |                |            |           |            |
| Age (years)                                                                   | 50s        | 70s            | 60s        | 60s       | 60s        |
| Gender                                                                        | Male       | Male           | Male       | Male      | Female     |
| Hospital stay (days)                                                          | 7          | 26             | 16         | 19        | 8          |
| <b>Concomitant medications</b>                                                |            |                |            |           |            |
| Antibiotics                                                                   | Cefotaxime | Cefotaxime     | Cefotaxime | Imipenem  | Cefotaxime |
| Chloroquine phosphate(dose)                                                   | 500mg BD   | 500mg BD       | 500mg OD   | 500mg BD  | 500mg OD   |
| Anticoagulant                                                                 |            | Enoxaparin     | Enoxaparin |           |            |
| Mucolytic                                                                     |            | Acetylcysteine |            |           |            |
| Anti-inflammatory                                                             |            | Betamethasone  |            |           |            |
| <b>Clinical parameters (range before rhDNase treatment start)<sup>1</sup></b> |            |                |            |           |            |
| <i>Vital signs</i>                                                            |            |                |            |           |            |
| Temperature (°C)                                                              | 35.8-36.9  | 36.2-38.1      | 37.9-40    | 36.8-40.3 | 35.1-37.7  |
| Respiratory rate (breaths/min)                                                | 18-23      | 22-36          | 20-30      | 20-37     | 18-24      |
| Pulse (beats/min)                                                             | 82-98      | 67-100         | 70-110     | 85-120    | 75-97      |
| <i>Blood cell counts</i>                                                      |            |                |            |           |            |
| WBC (x10 <sup>9</sup> /L)                                                     | 6.9-11.4   | 9.1-19.3       | 6.7-8.4    | 3.1-11.9  | 7-8.4      |
| Neutrophils (x10 <sup>9</sup> /L)                                             | 6.3-11.1   | 8.4-17         | 5.3-7.1    | 2.7-2.8   | 5.4-7.2    |
| Lymphocytes (x10 <sup>9</sup> /L)                                             | 0.3-0.4    | 0.2-1.2        | 0.5-0.9    | 0.3-0.3   | 0.7-1.1    |
| <i>Severity markers</i>                                                       |            |                |            |           |            |
| CRP (mg/L)                                                                    | 223-231    | 23-192         | 224-296    | 83-211    | 219-278    |
| PCT (µg/L)                                                                    | 0.48       | 0.17-3.5       | 1.6        |           |            |
| LD (µkat/L)                                                                   | 7.3-7.3    | 6.6-13         | 4.2-5.4    | 1.2-9.7   |            |
| D-dimer (mg/L)                                                                | 0.63       | 2.4-10         | 0.85-0.9   | 2-2       | 1.4-2.9    |
| Ferritin (µg/L)                                                               | 892-1042   | 649-3949       | 1535-1717  | 8748      | 1158-1342  |
| Fibrinogen (g/L)                                                              | 8.8-9      | 6.6-6.7        | 8.4        |           | 9-9        |
| Triglycerides (mmol/L)                                                        | 2.1-2.2    | 0.9-1.7        | 1.2.1.4    | 1.6       |            |
| NEWS                                                                          | 4-6        | 6-9            | 6-9        | 6-14      | 4-8        |
| <b>Organ failures and biomarkers (range before rhDNase treatment start)</b>   |            |                |            |           |            |
| Total number of failing organs                                                | 1          | 3              | 2          | 2         | 2          |
| <i>Cognitive</i>                                                              | no         | no             | no         | no        | no         |
| Glasgow coma score                                                            | 15-15      | 15-15          | 15-15      | 15-15     | 15-15      |
| <i>Liver</i>                                                                  | no         | no             | no         | no        | no         |

|                                       |            |            |            |            |            |
|---------------------------------------|------------|------------|------------|------------|------------|
| Creatinine ( $\mu\text{mol/L}$ )      | 67-82      | 138-318    | 129-155    |            | 62-150     |
| <i>Coagulopathy</i>                   | no         | no         | no         | no         | no         |
| INR                                   | 1.1        | 0.9-1      | 1          | 1.1        | 0.9-1.2    |
| Platelets ( $\times 10^9/\text{L}$ )  | 260-314    | 283-650    | 214-234    | 134-162    | 208-293    |
| <i>Cardiovascular</i>                 | no         | <b>yes</b> | no         | <b>yes</b> | no         |
| Estimated MAP (mmHg)                  | 82-102     | 68-90      | 73-90      | 63-93      | 78-98      |
| <i>Respiratory</i>                    | <b>yes</b> | <b>yes</b> | <b>yes</b> | <b>yes</b> | <b>yes</b> |
| O <sub>2</sub> Saturation (%)         | 91-98      | 80-97      | 89-95      | 86-96      | 88-96      |
| SpO <sub>2</sub> /FiO <sub>2</sub>    | 192-245    | 111-381    | 118-424    | 171-383    | 391-447    |
| <b>rhDNase treatment</b>              |            |            |            |            |            |
| Treatment start (days from admission) | 3.5        | 10.5       | 3.5        | 4.5        | 5          |
| Treatment duration (days)             | 3          | 5          | 6          | 5          | 3          |

TP = treated patient; ACE2 = angiotensin converting enzyme-2; BD = bi-daily; OD = once daily; WBC = white blood cell count; CRP = C-reactive protein; PCT = procalcitonin; LD = lactate dehydrogenase; NEWS = national early warning score; ALT = alanine transaminase; AST = aspartate aminotransferase; INR = international normalized ratio; MAP = mean arterial pressure; SpO<sub>2</sub> = peripheral capillary oxygen saturation; = FiO<sub>2</sub> = fraction of inspired oxygen

<sup>1</sup>Where only one measurement was taken during this time, only one number is reported

Fig. S3. Heat map of sputum proteome after treatment with rhDNase.

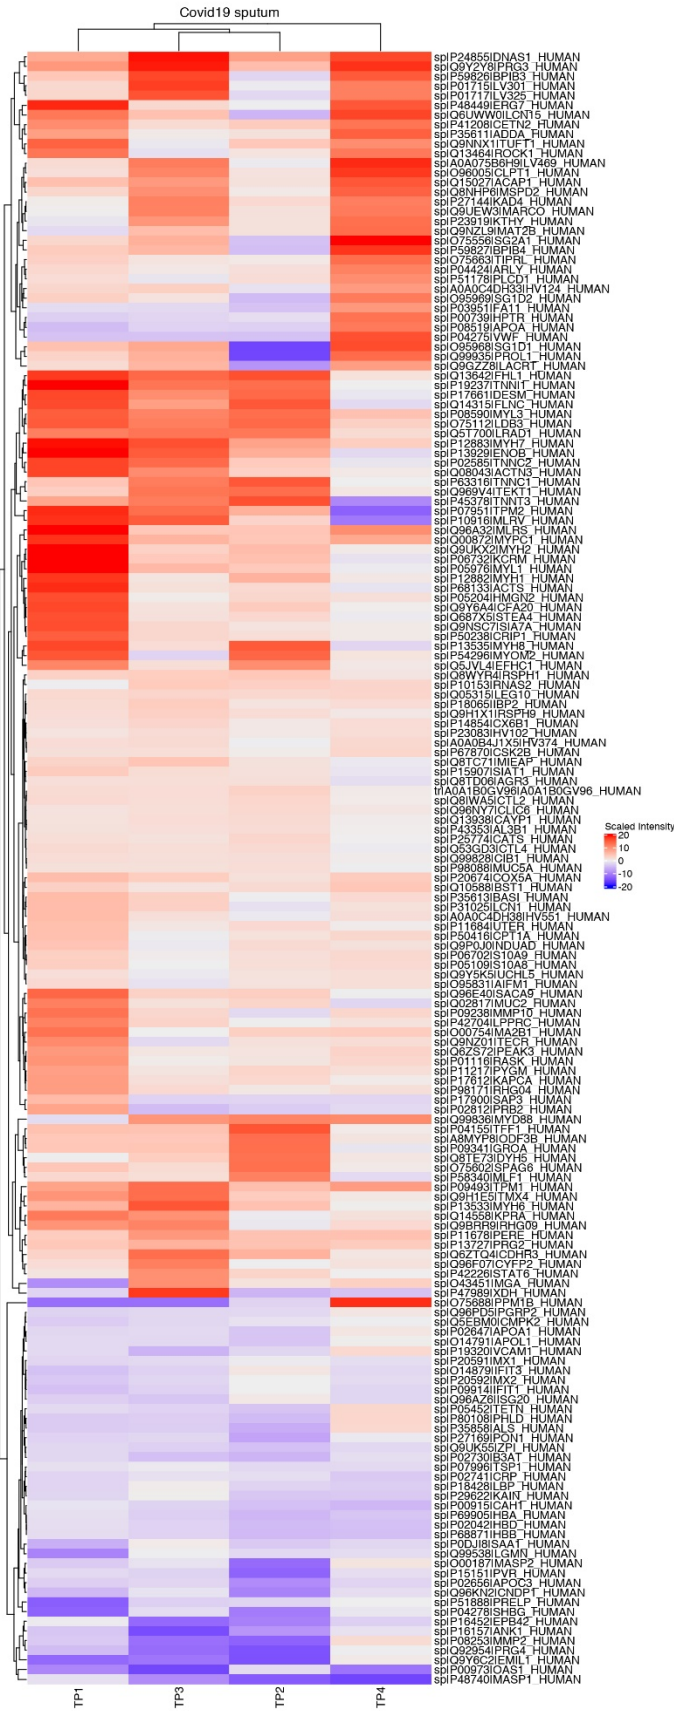

**Differential analysis of sputum protein abundance levels between covid-19 patients pre- and post DNase1 treatment.** Heatmap of 170 proteins (rows) identified to change with DNase1 treatment (TP1-TP4). The mapped gene name for each protein are indicated to the right. The columns for each patient are the days relative to DNase1 treatment start (Day 0) and are plotted as barplots above the heatmap. Colours in the heatmap represent the the scaled intensity per protein and patient (where maximum intensity is set to 1).



Fig.S4. Sputum proteins over time per patient

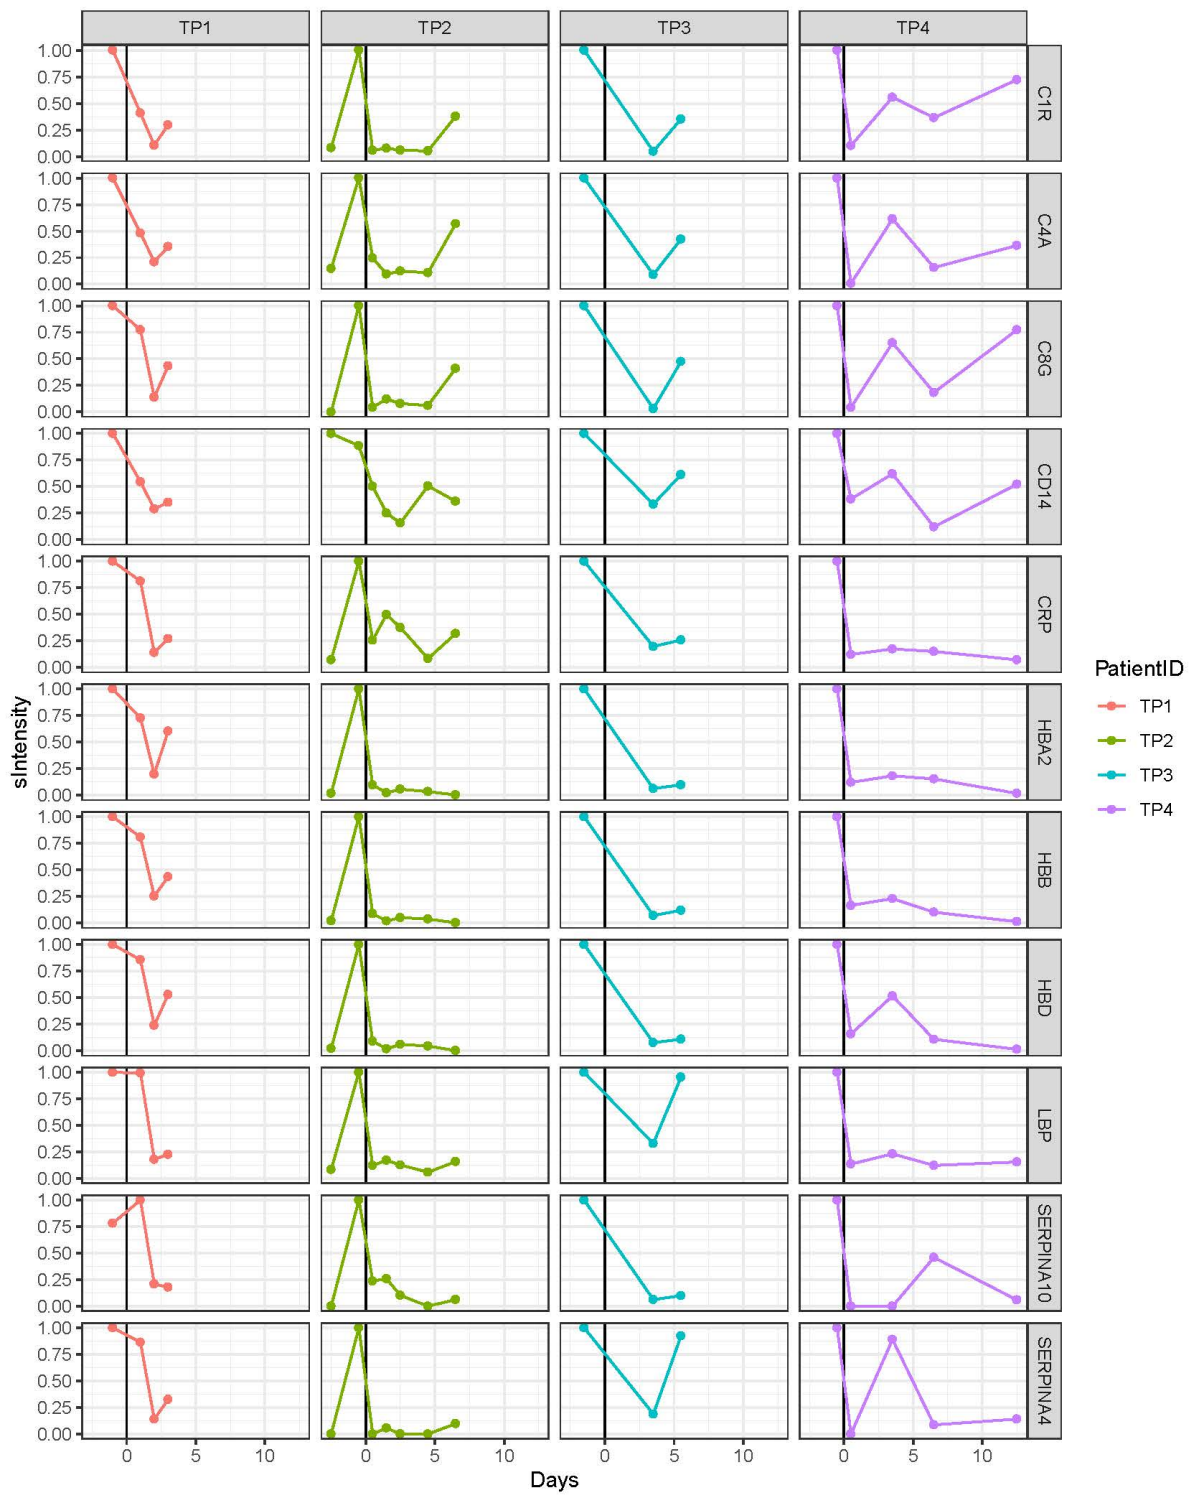

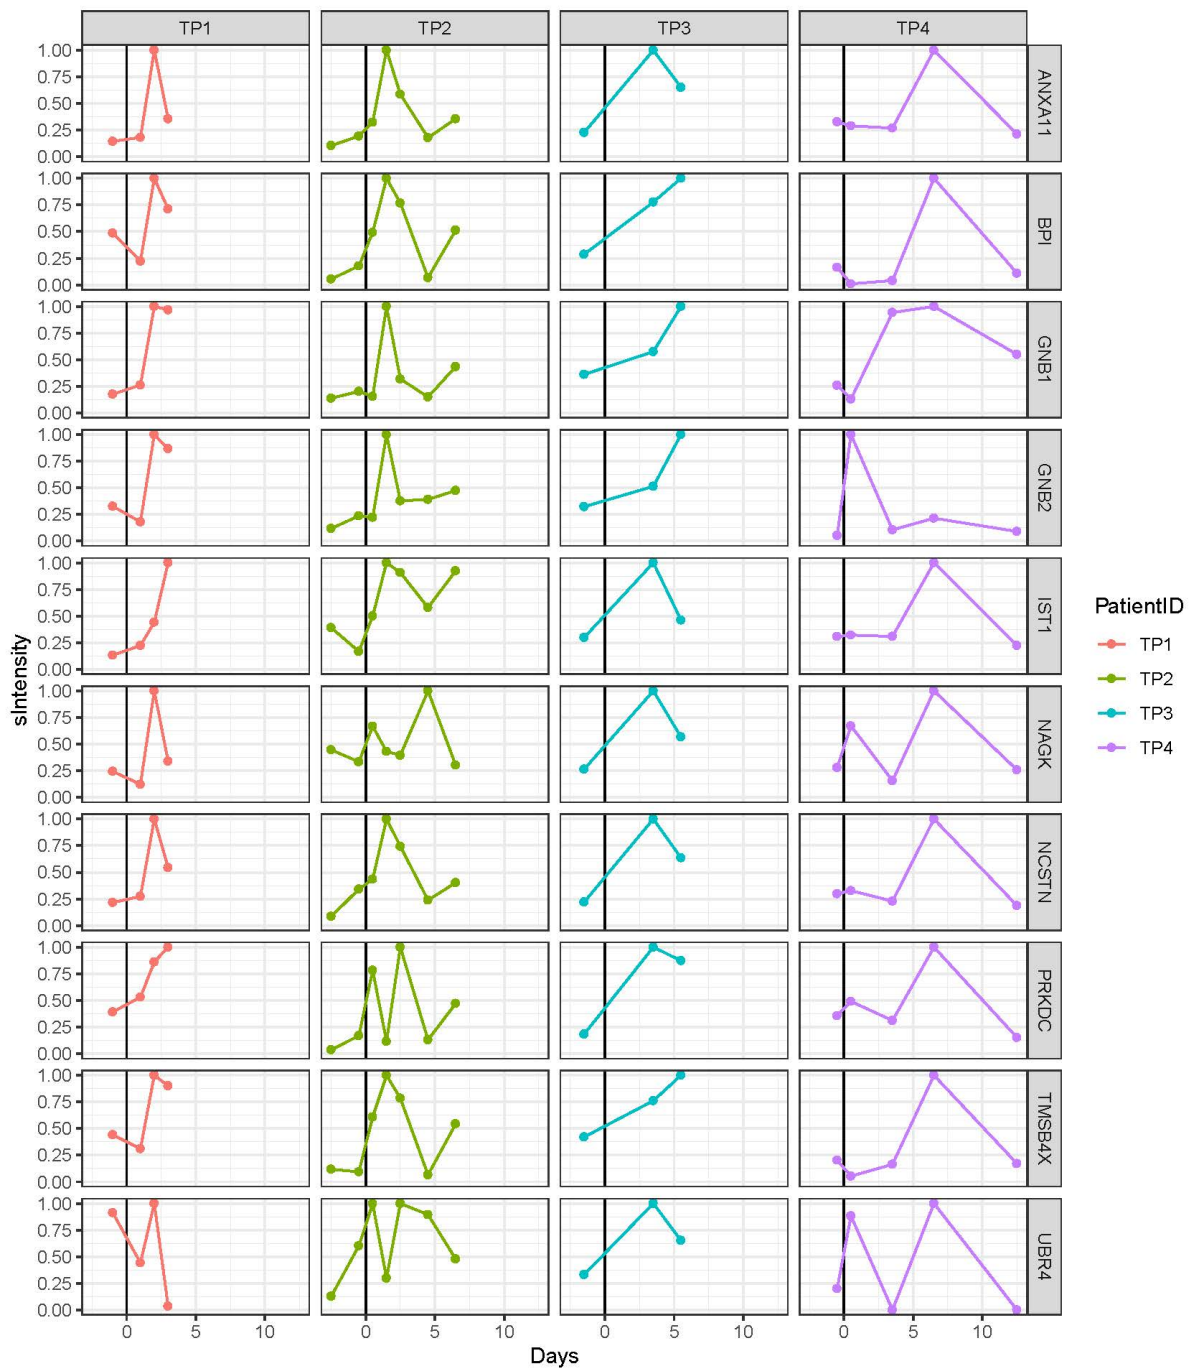

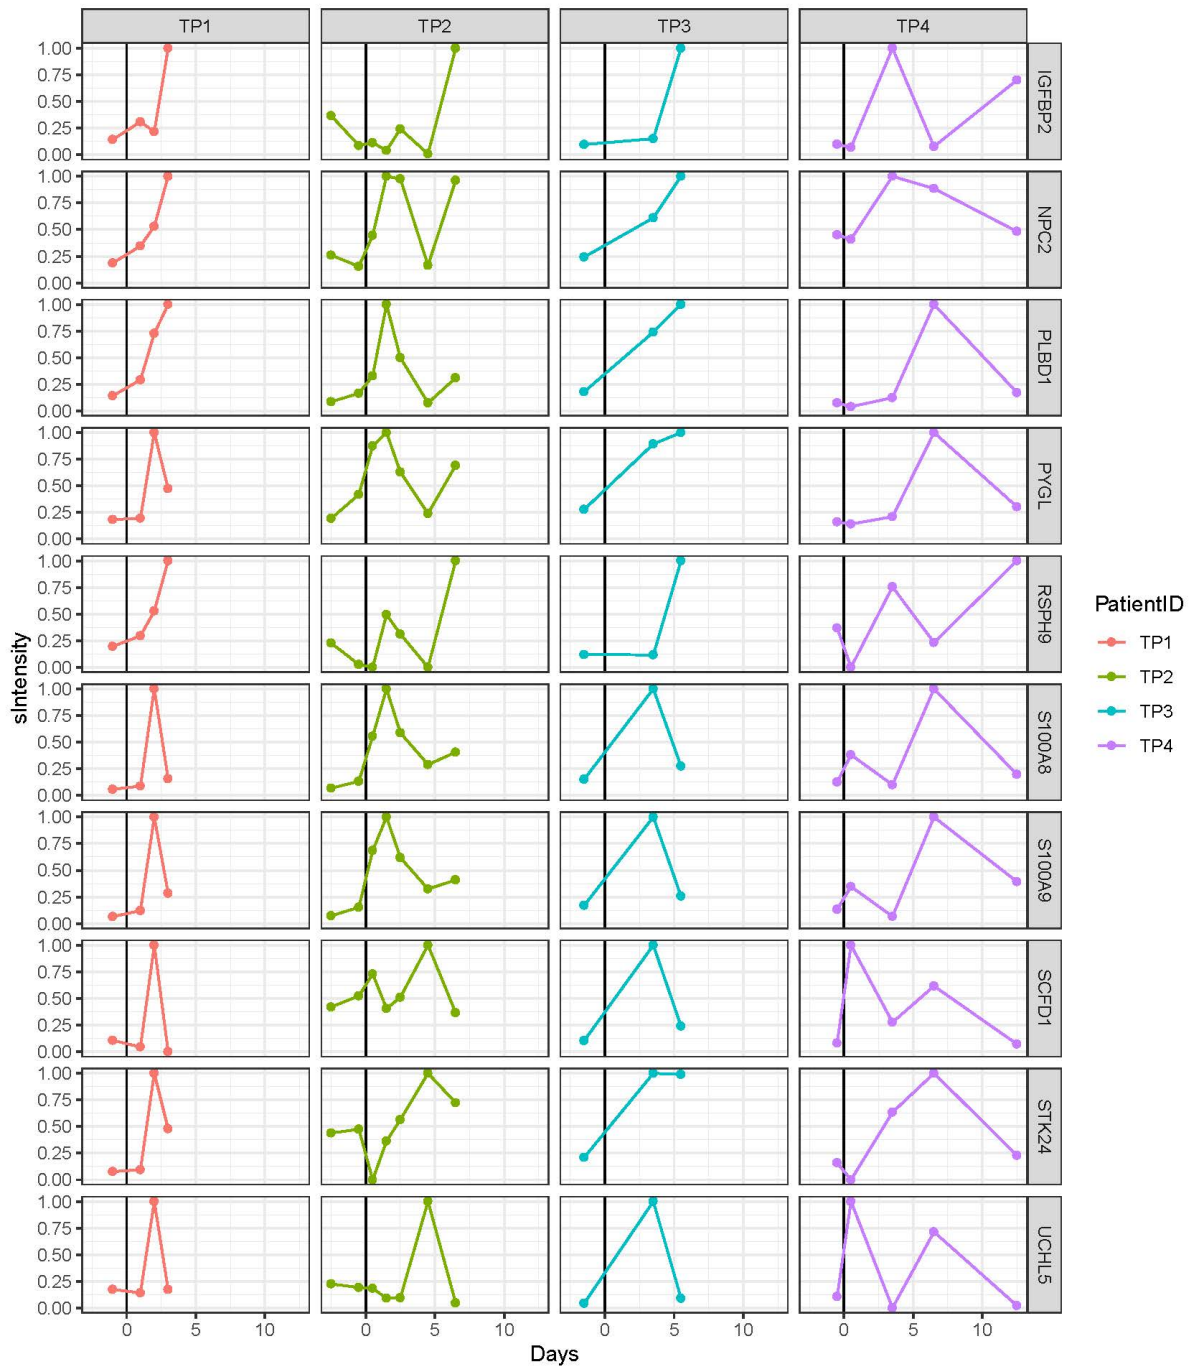

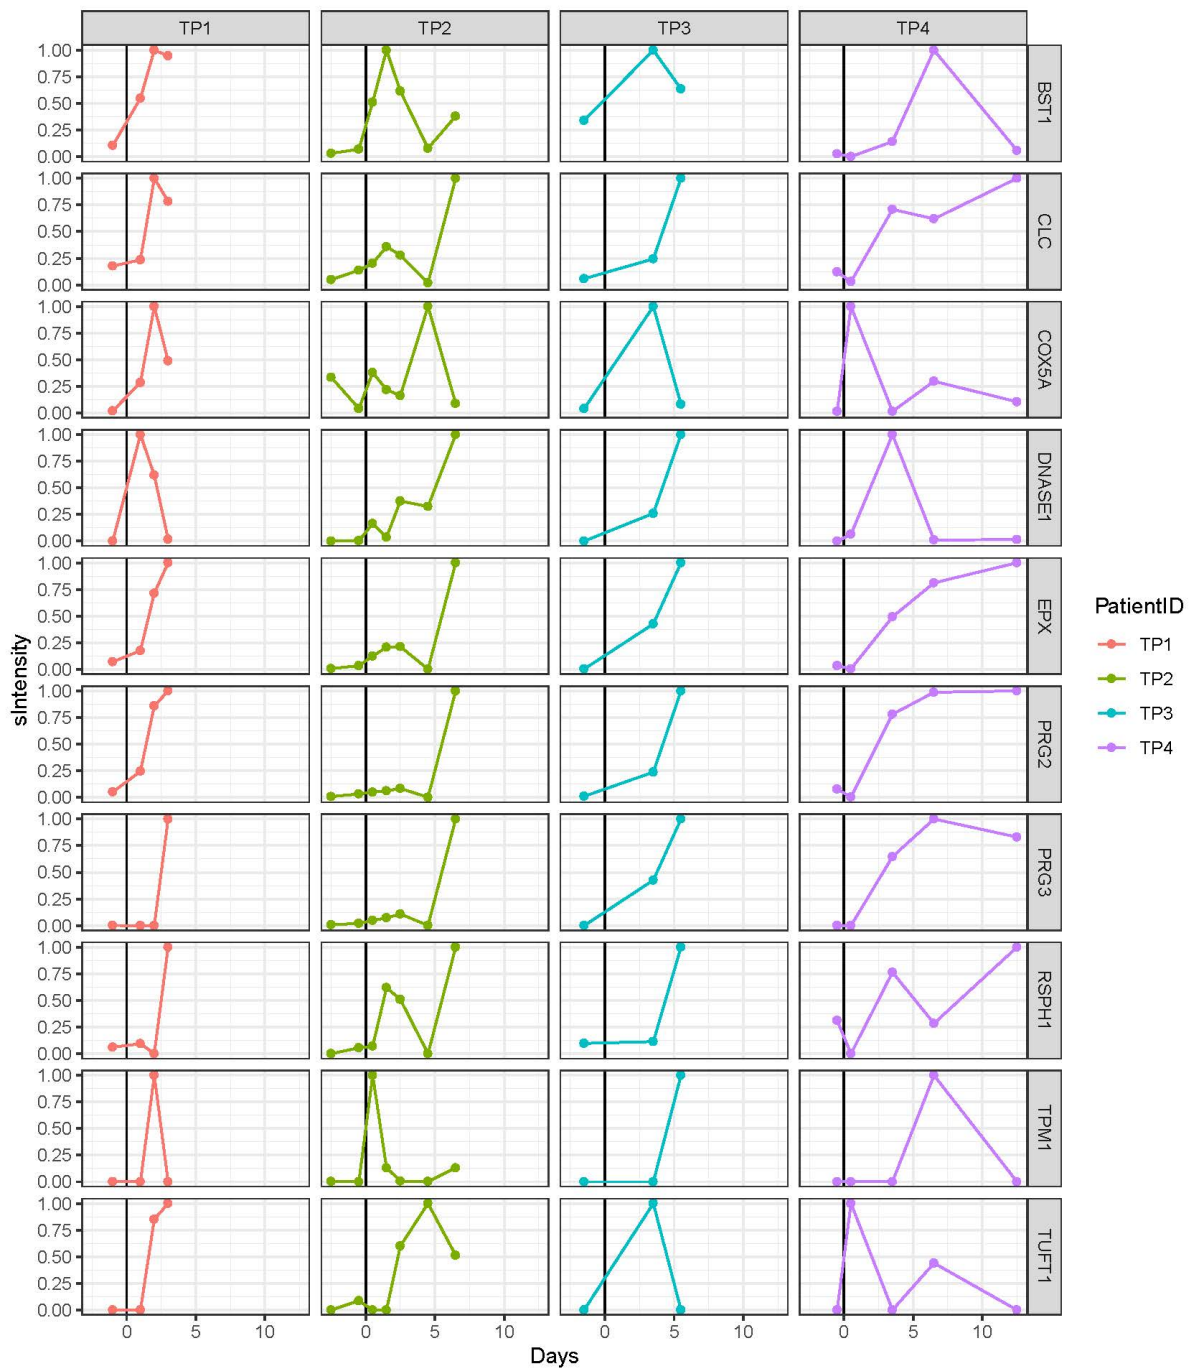

Individual plots of 10 selected proteins from a) (the scaled intensity is the same as in a). The vertical black lines in plots indicate Day 0 (DNase1 treatment start).

Fig. S5. Volcano plot depicting plasma proteins significantly regulated after rhDNase treatment.

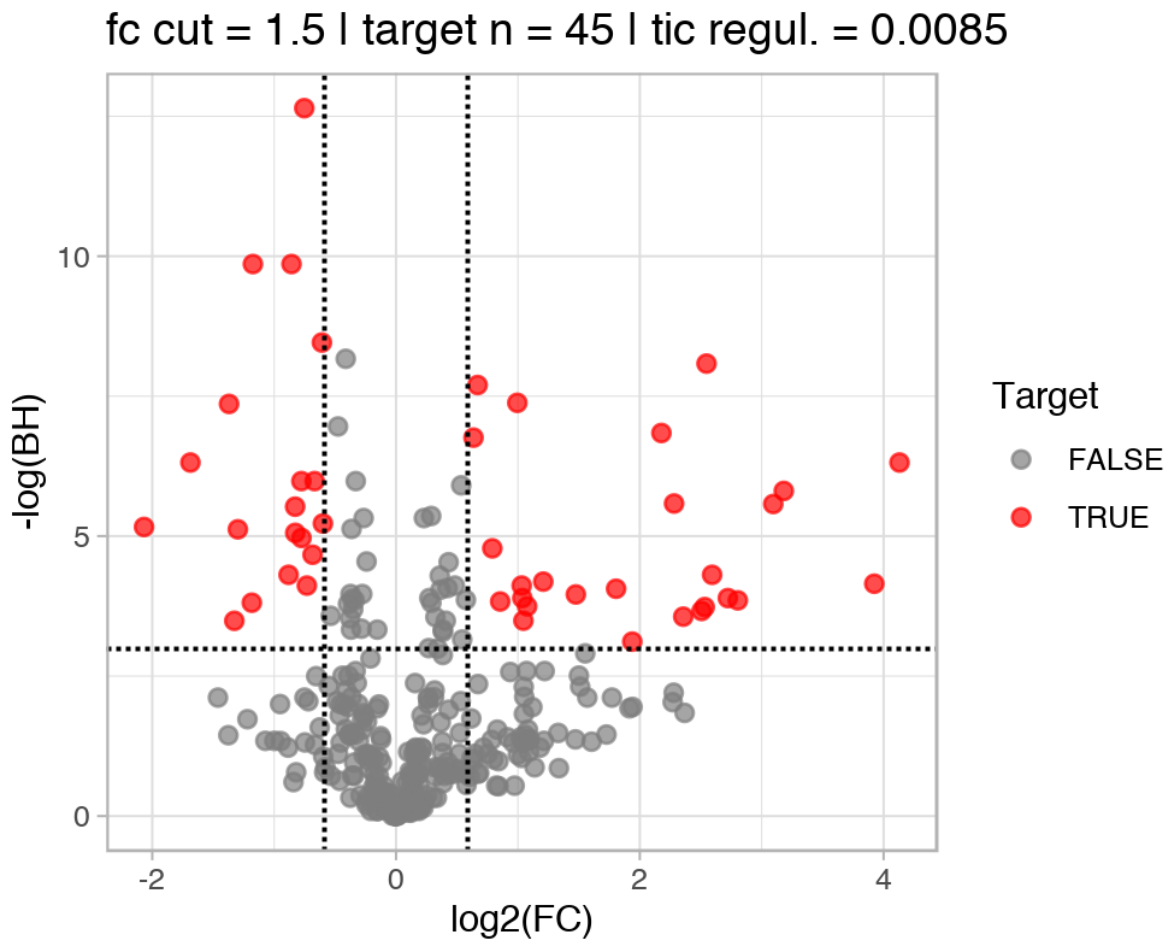

**Volcano plot of plasma proteins of covid-19 patients pre- versus post DNase1 treatment.** Vertical dotted lines are the foldchange cut offs (-1/1.5 and +1.5). Horizontal dotted line is the adjusted p-value cut off (0.05, Benjamini & Hochberg corrected).

Fig. S6. Plasma proteins intensity plots per patient over time.

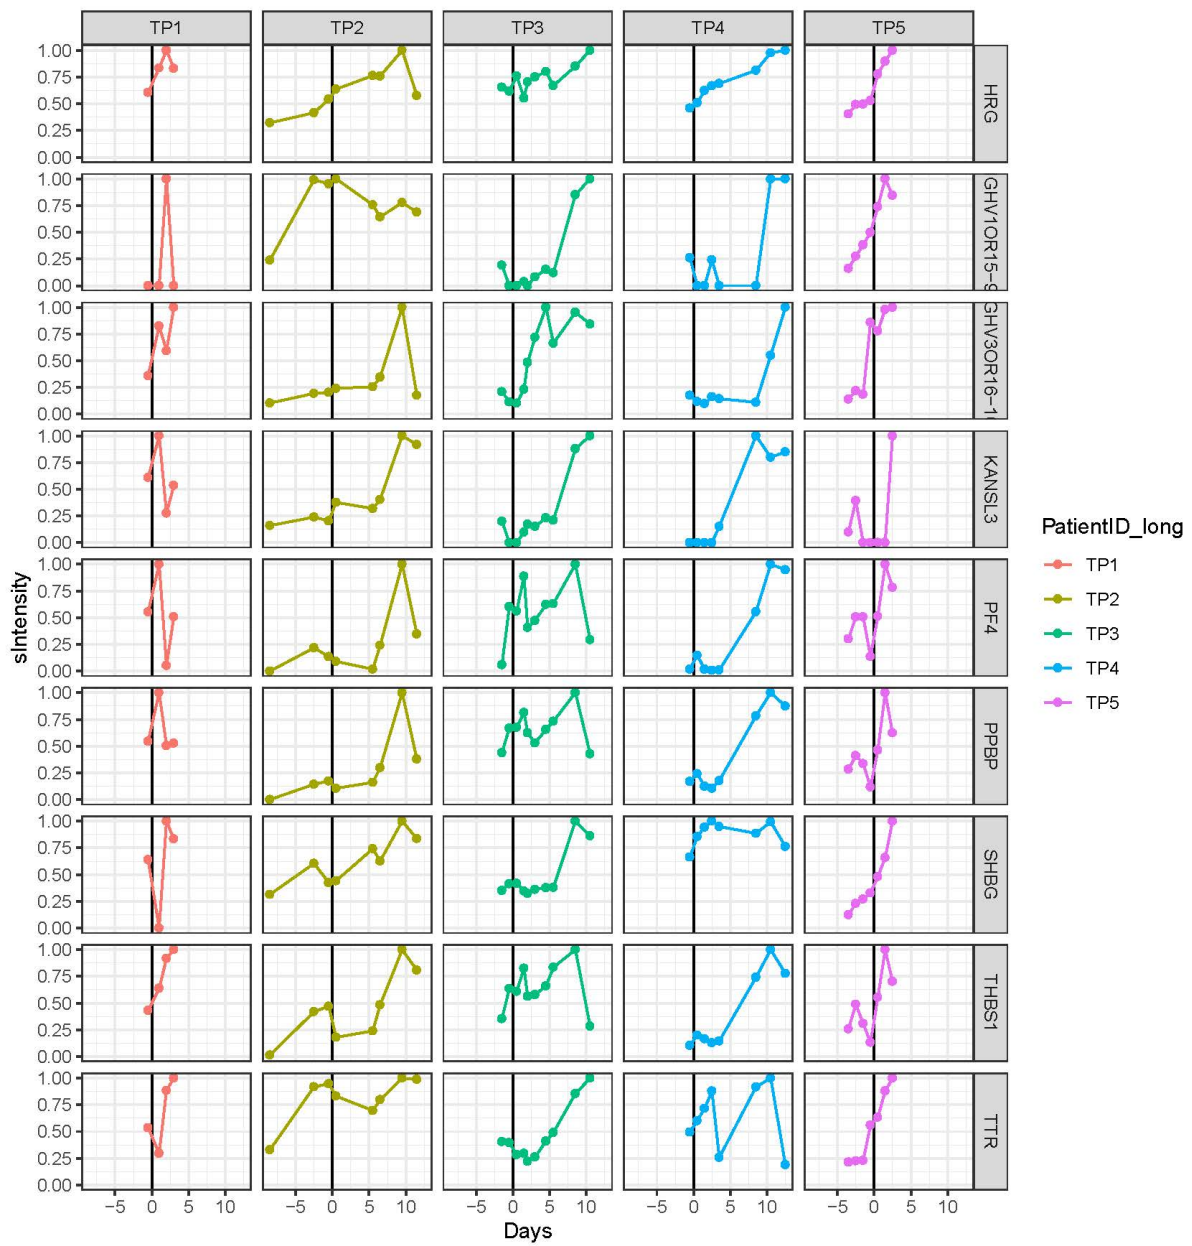

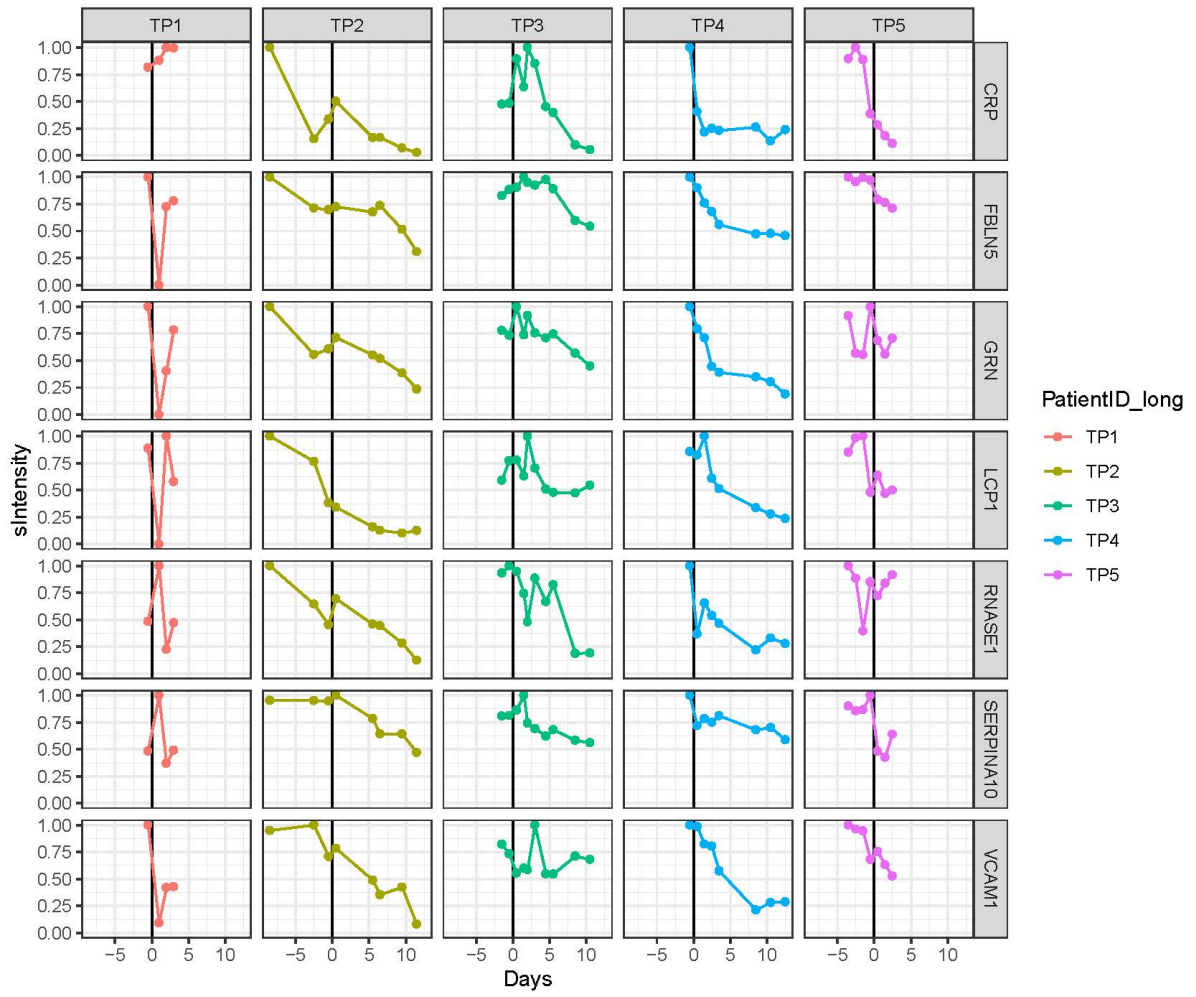

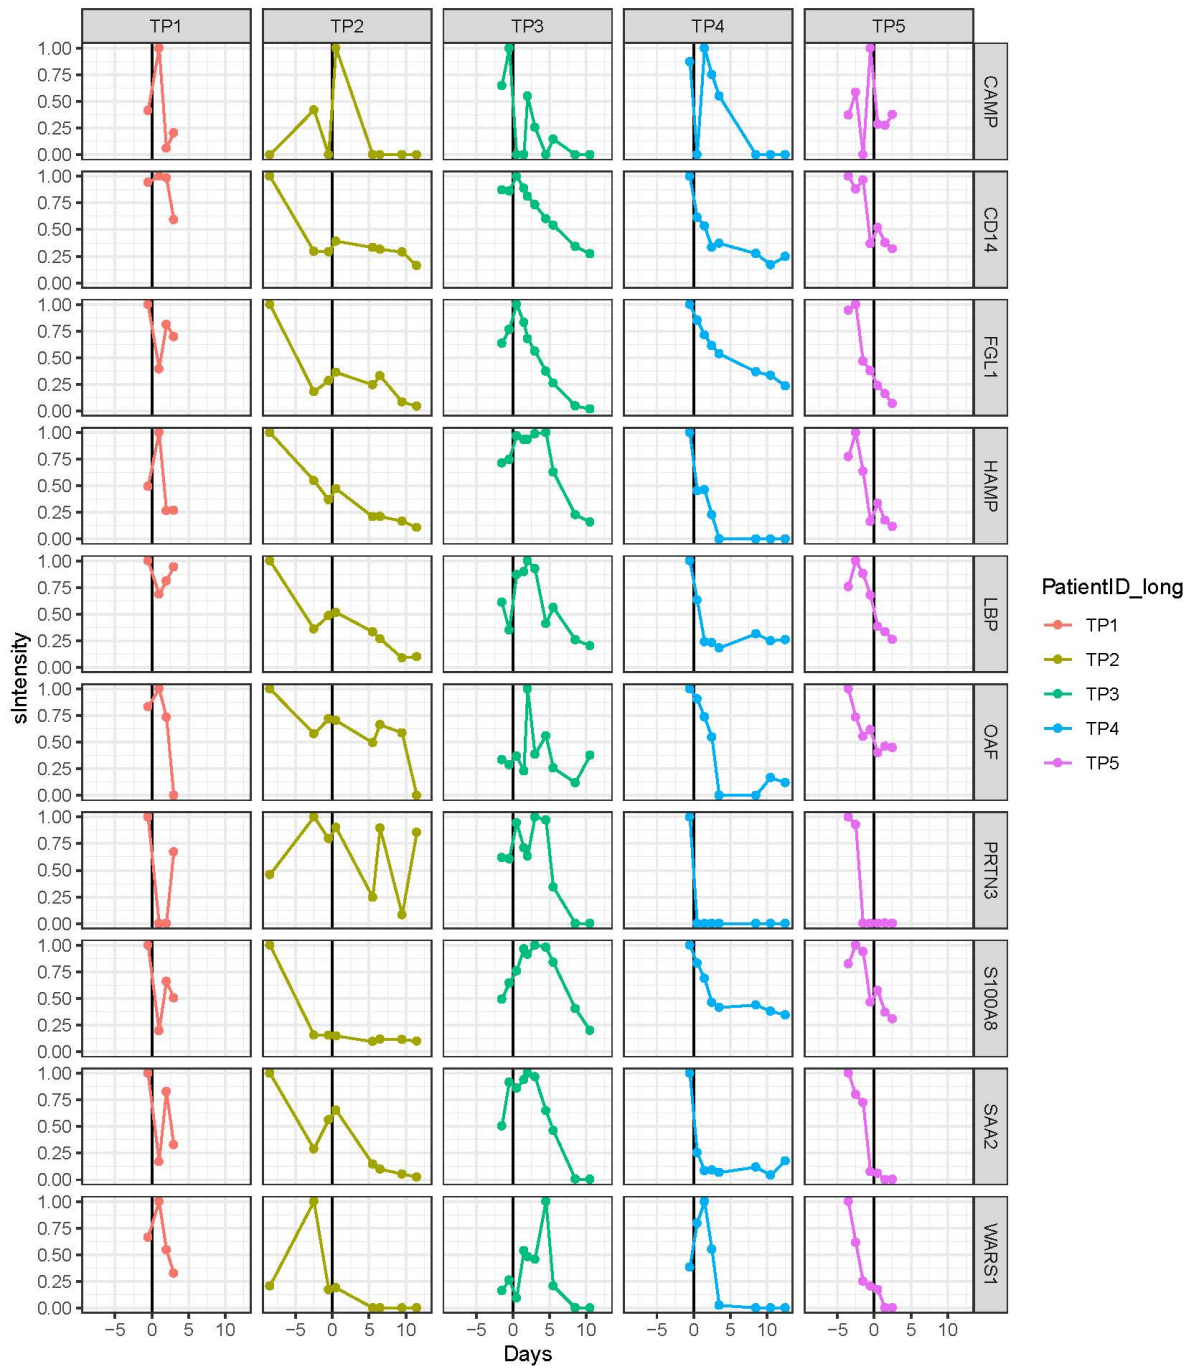



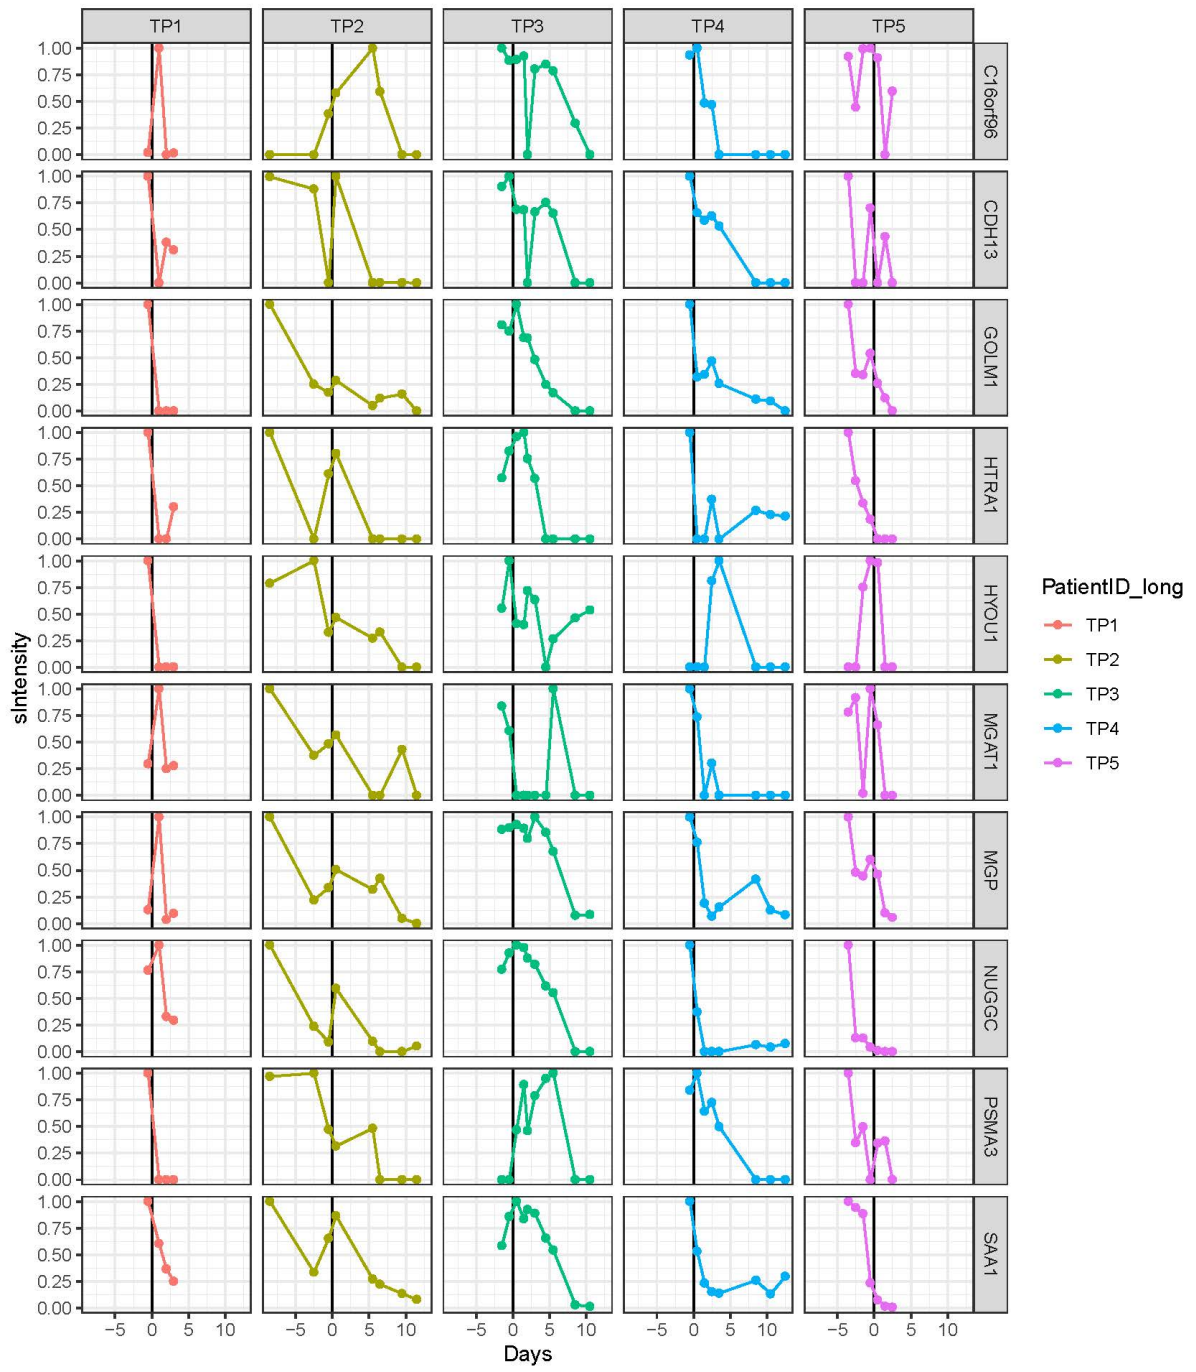

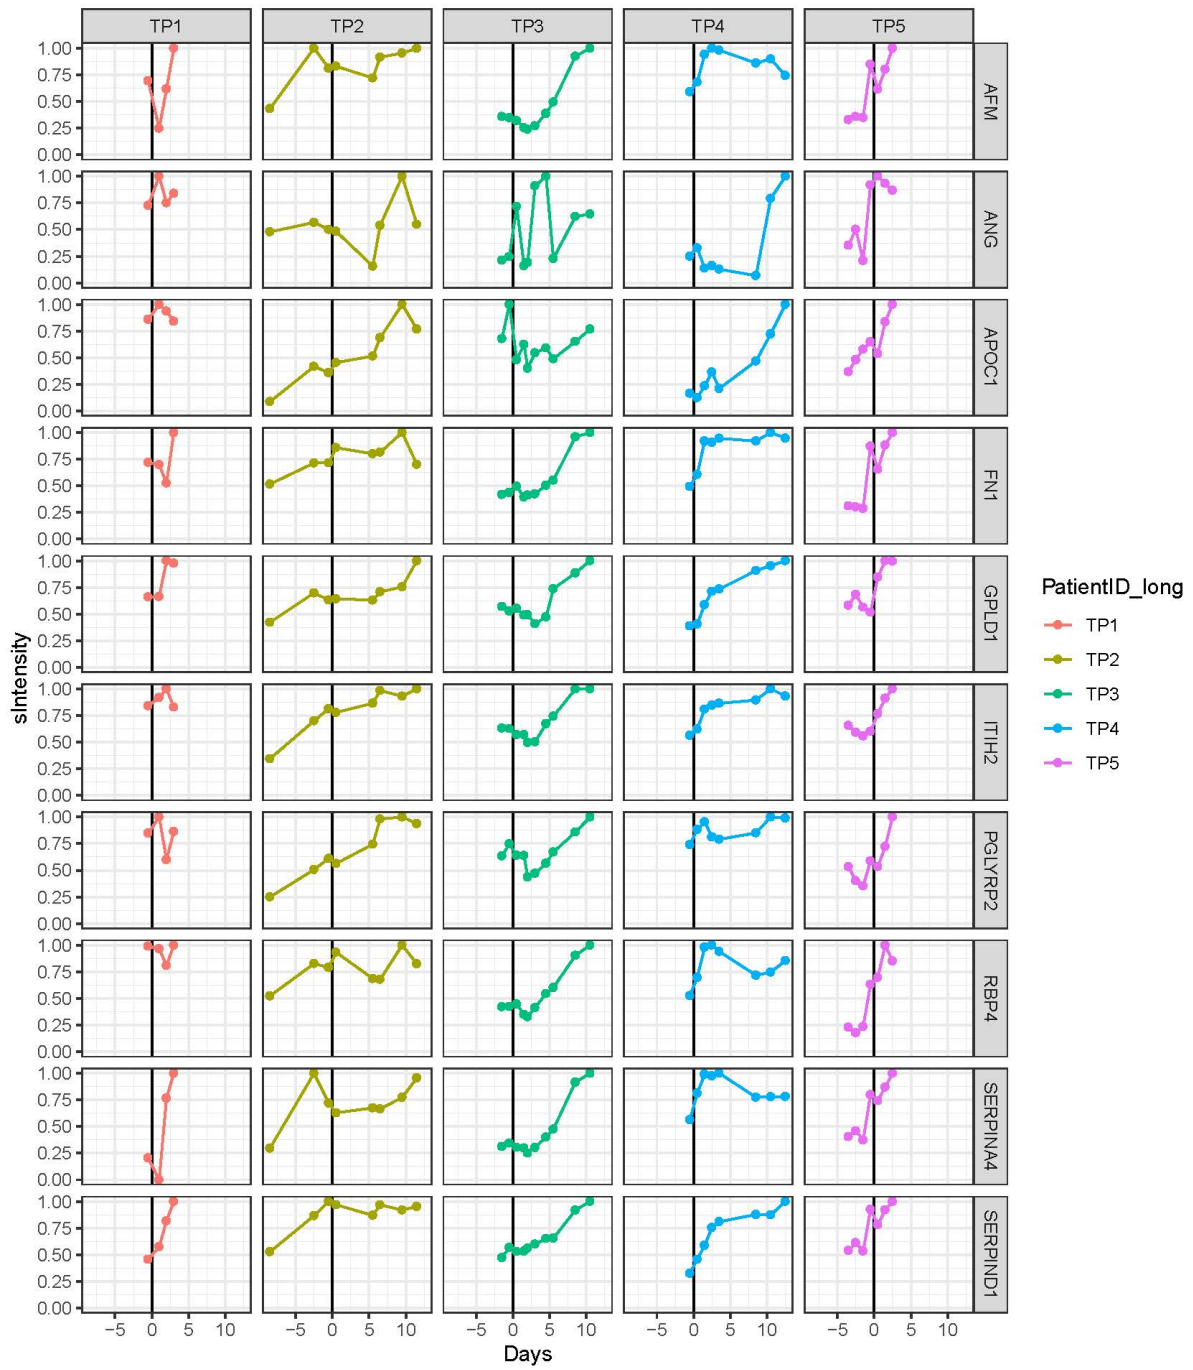

Individual plots of all proteins included in Figure 6. The vertical black lines in plots indicate Day 0 (DNase1 treatment start).

Fig. S7. Comparison of blood plasma from untreated, rhDNase-treated, and healthy individuals.

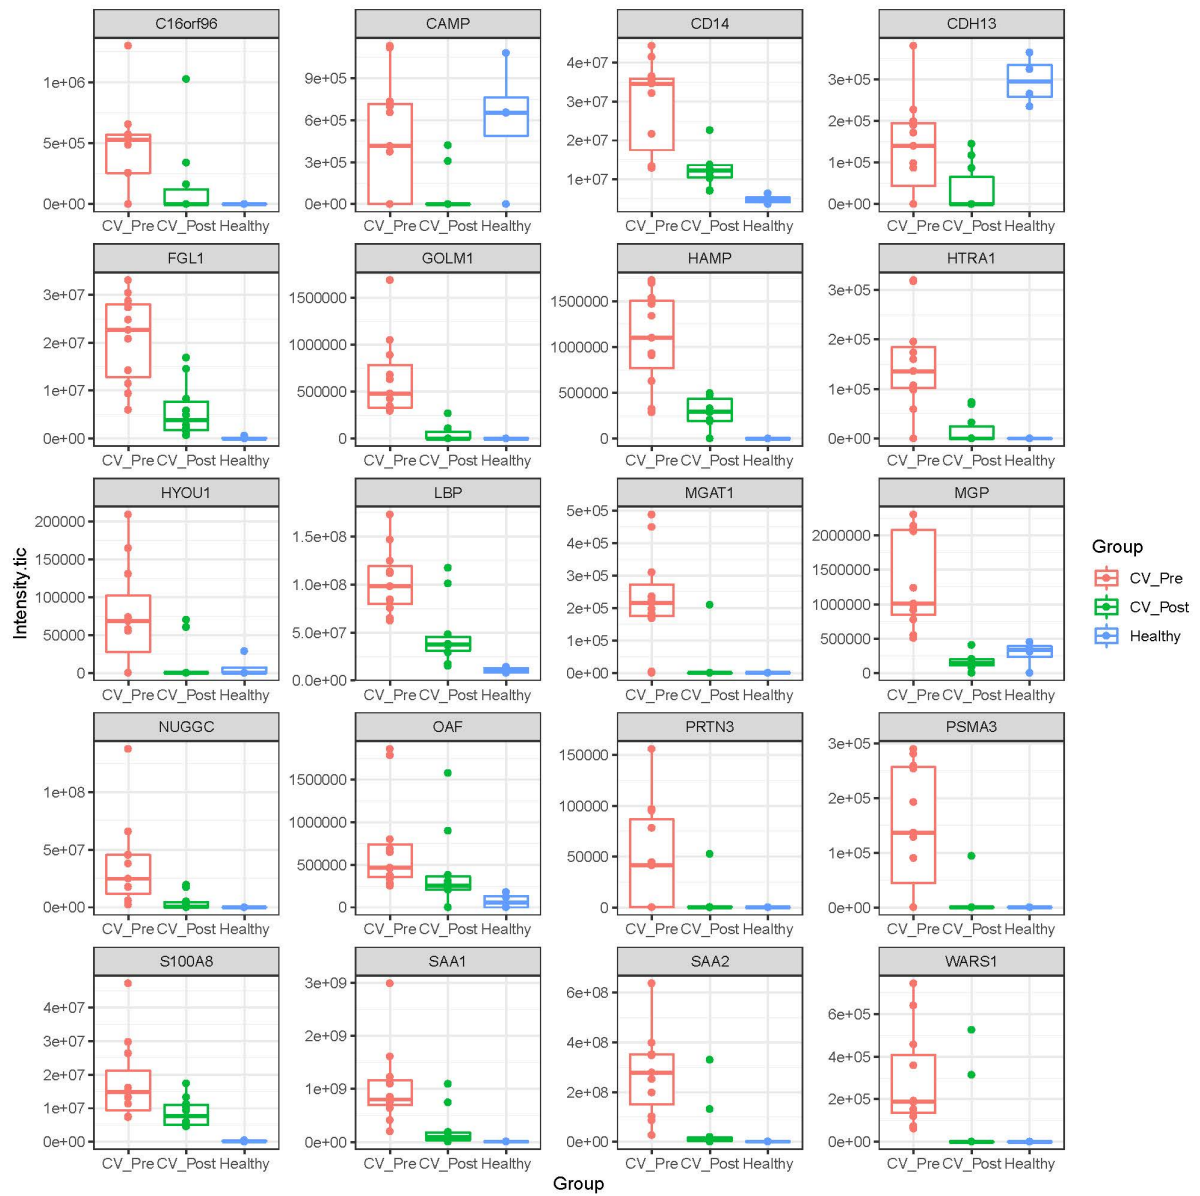

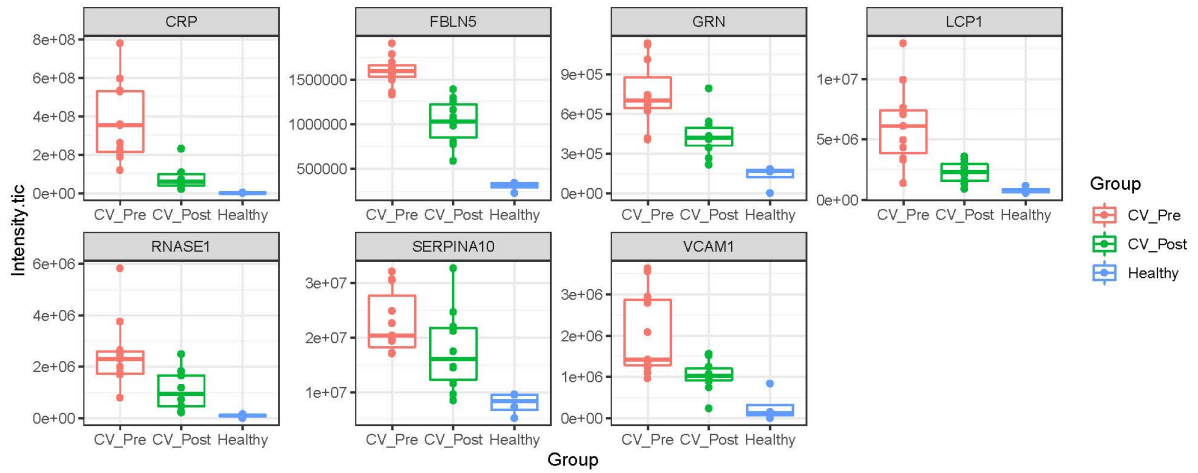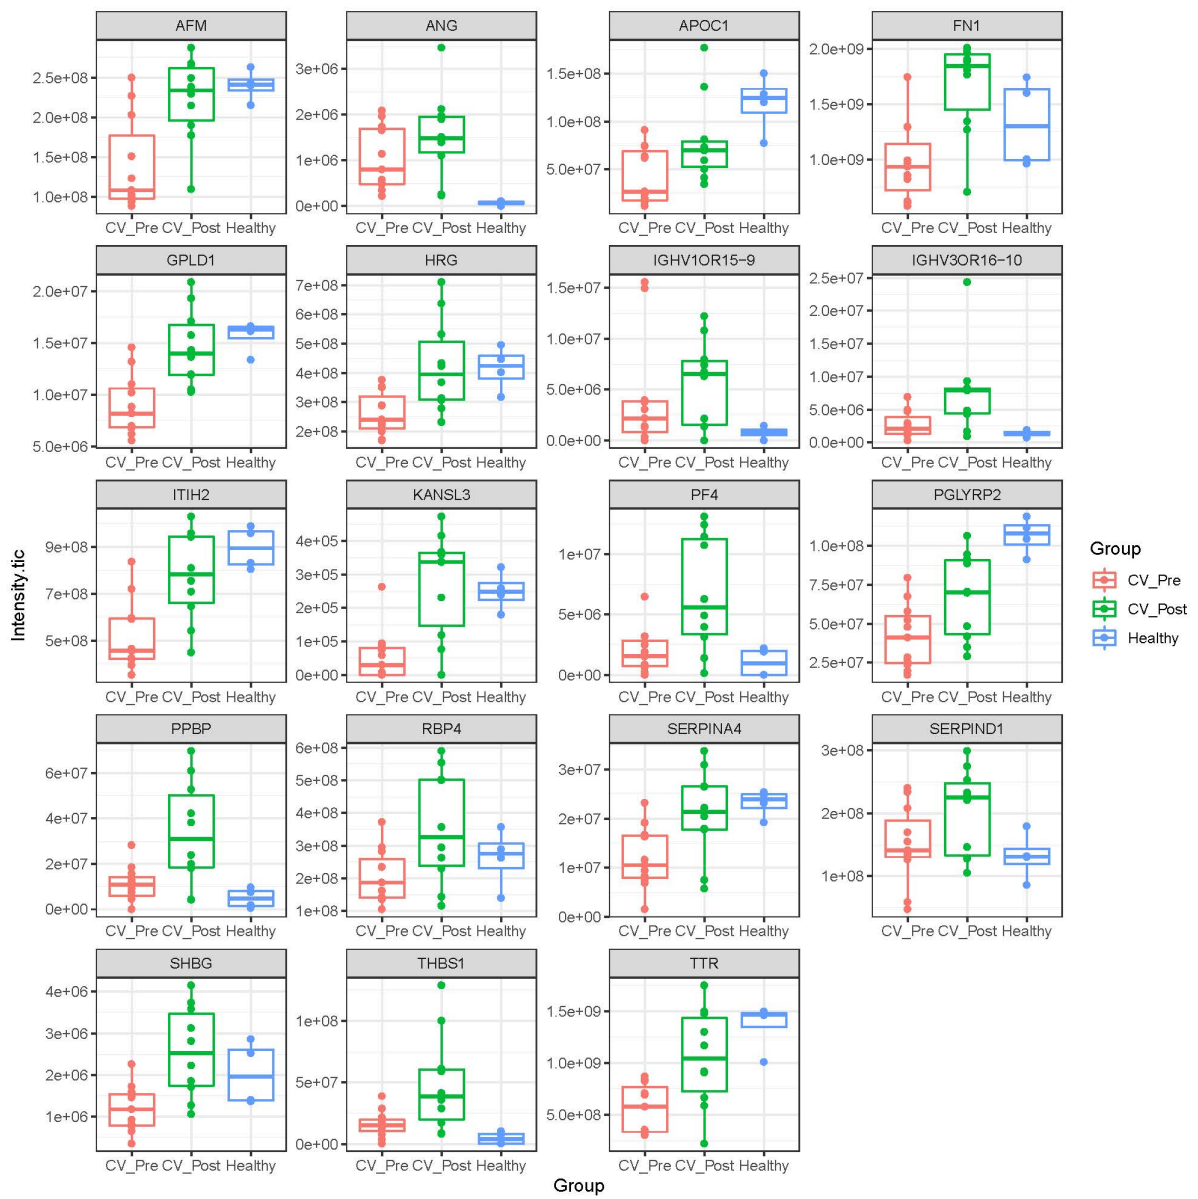

Boxplots of all proteins included in the heat map presented in Figure 6 A compared with untreated (CV\_Pre), rhDNase treated (CV\_Post) and healthy blood plasma (Healthy).
